# Supplementary material for: Effects of niobium and molybdenum impregnation on adsorption capacity and Fenton catalytic activity of magnetite
Source: Royal Society of Chemistry journal article supplement (doi:10.1039/c5ra15660b), 2015-01-01
Supplement: c5ra15660b1.pdf [file c5ra15660b1.pdf]

## Appendix A. Supplementary data

### **Effects of niobium and molybdenum impregnation on adsorption capacity and Fenton catalytic activity of magnetite**

Shima Rahim Pouran, A.R. Abdul Aziz\*, Wan Mohd Ashri Wan Daud, Mohammad Saleh Shafeeyan

\* Chemical Engineering Department, Faculty of Engineering, University of Malaya, 50603 Kuala Lumpur, Malaysia.

\* Corresponding author. Tel.: +60 3 79675300; Fax: +60 3 79675319. E-mail address: [azizraman@um.edu.my](mailto:azizraman@um.edu.my)

Postal address: Chemical Engineering Department, Faculty of Engineering, University of Malaya, 50603 Kuala Lumpur, Malaysia.

## Summary

Total number of pages: 4 (1-4)

Total number of figures: 6 (Fig. S1 a,b,c,d,e and f)

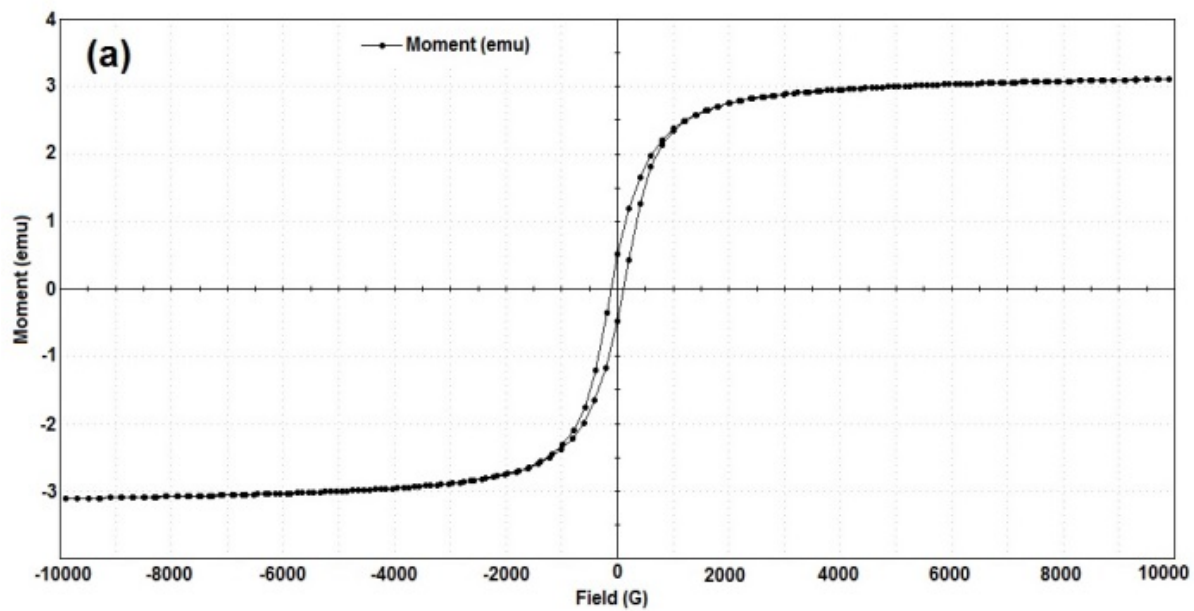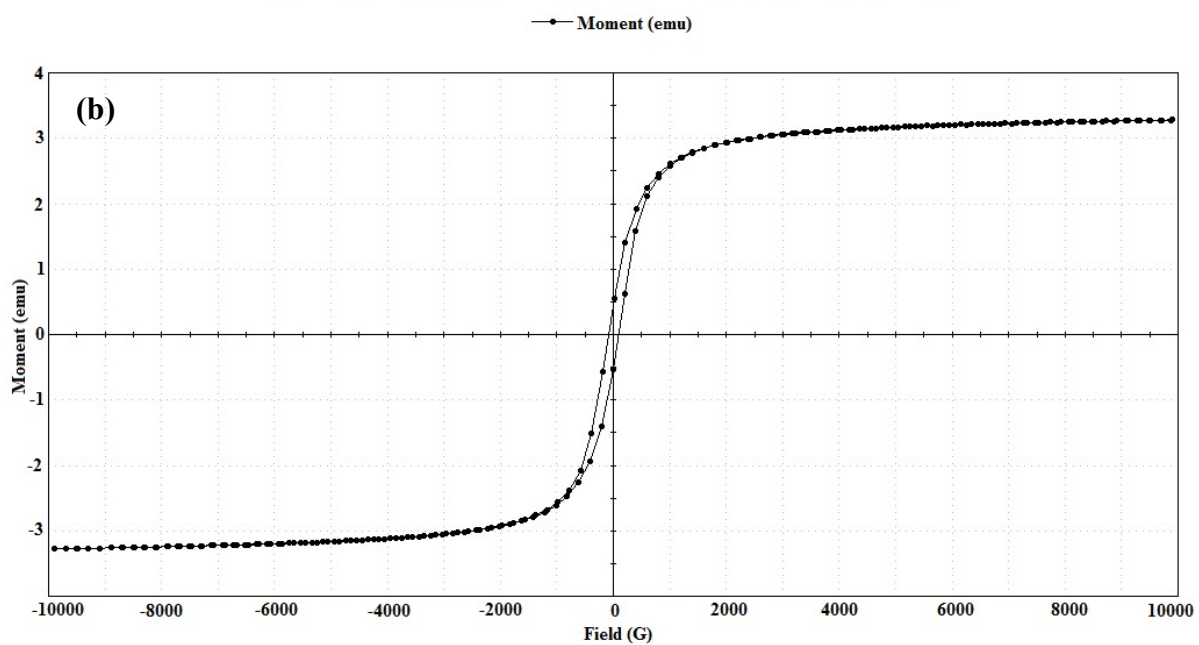

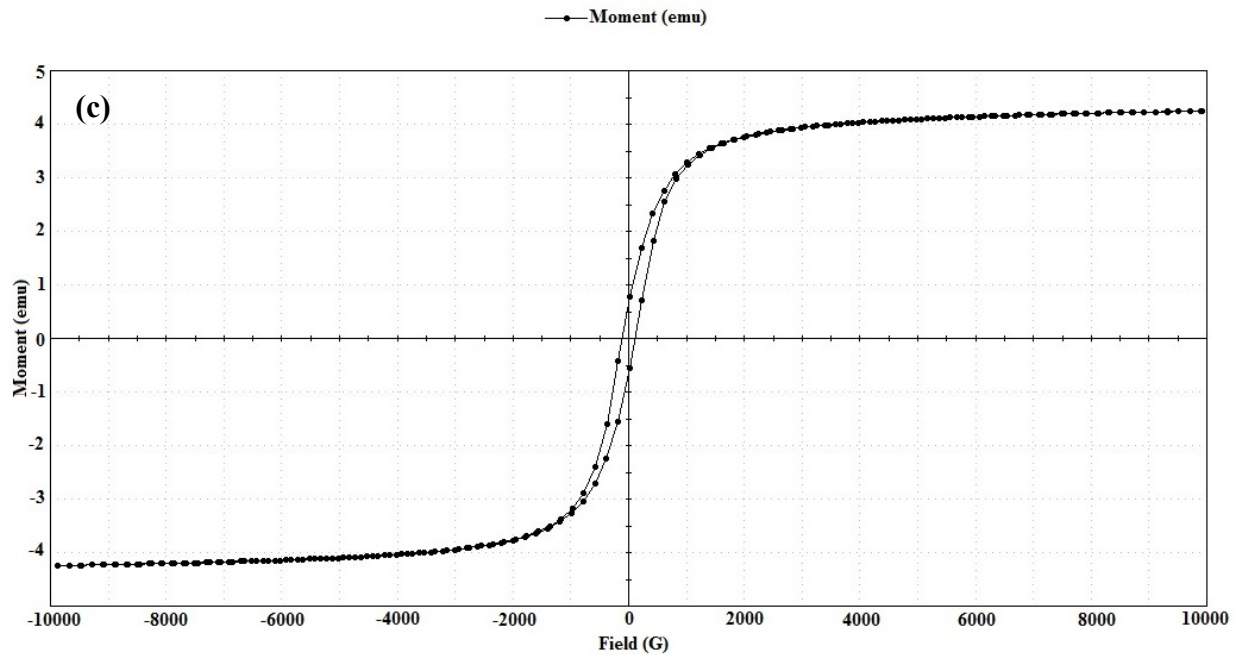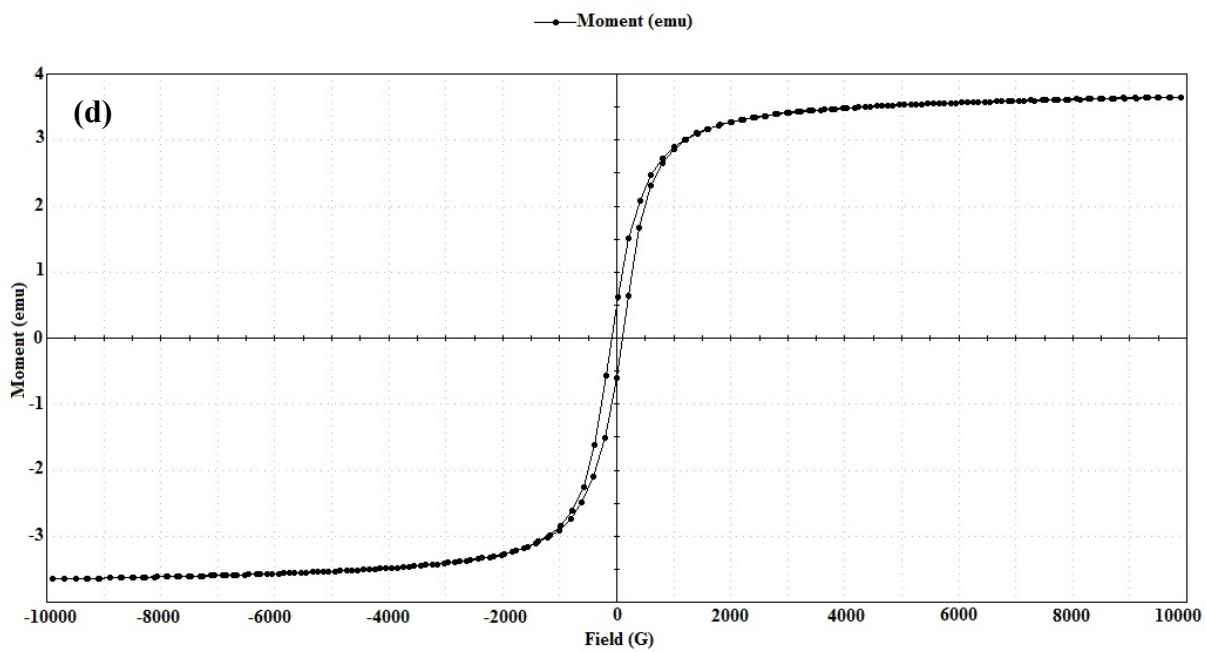

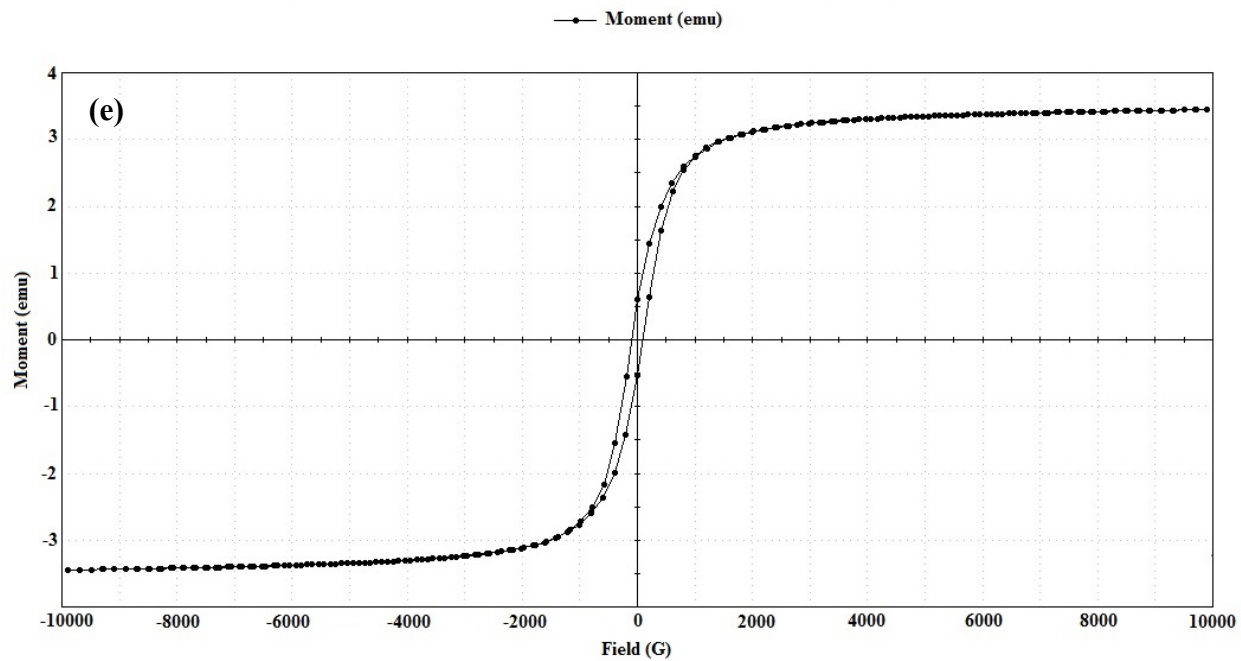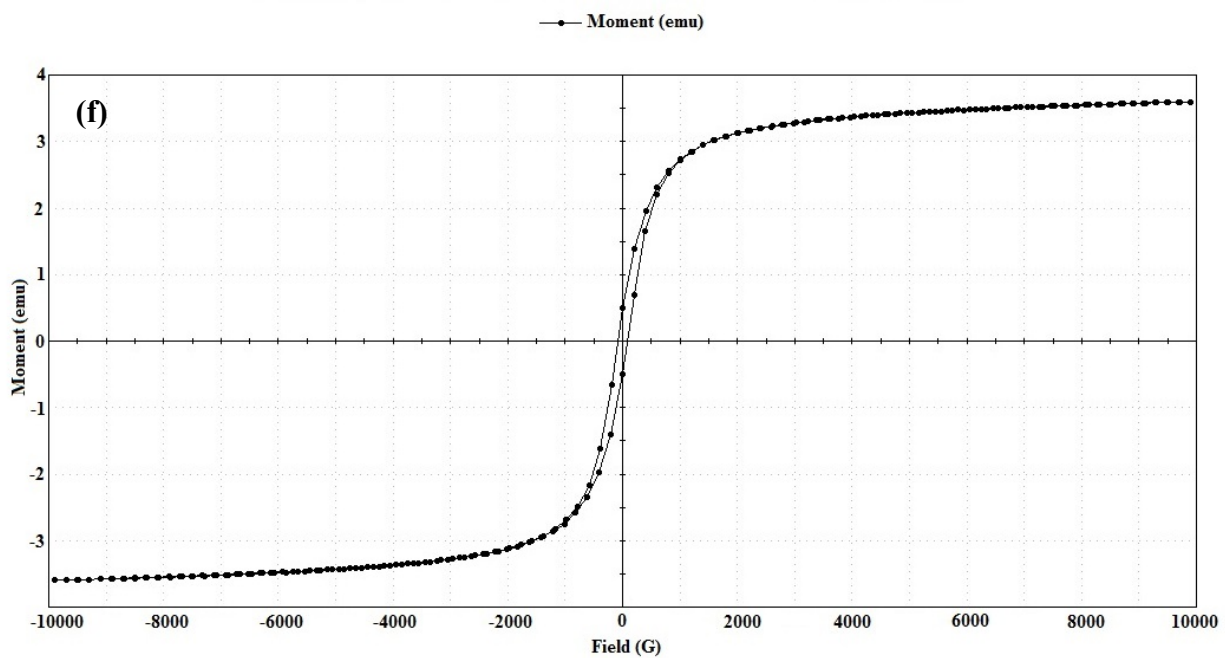

**Fig. S1** Hysteresis loops for (a)  $\text{Fe}_3\text{O}_4$  (b)  $\text{Fe}_{2.79}\text{Nb}_{0.0249}\text{Mo}_{0.094}\text{O}_4$ , (c)  $\text{Fe}_{2.79}\text{Nb}_{0.049}\text{Mo}_{0.089}\text{O}_4$ , (d)  $\text{Fe}_{2.79}\text{Nb}_{0.099}\text{Mo}_{0.073}\text{O}_4$ , (e)  $\text{Fe}_{2.79}\text{Nb}_{0.149}\text{Mo}_{0.032}\text{O}_4$  and (f)  $\text{Fe}_{2.79}\text{Nb}_{0.171}\text{Mo}_{0.023}\text{O}_4$  samples
